# Supplementary material for: A sensitive sandwich-type electrochemical aptasensing platform based on Ti3C2Tx/MoS2/MWCNT@rGONR composites for simultaneous detection of kanamycin and chloramphenicol in food samples
Source: Royal Society of Chemistry journal article supplement (doi:10.1039/d4ay00545g), 2024-01-01
Supplement: d4ay00545g1.pdf [file d4ay00545g1.pdf]

Electronic Supplementary Information (ESI) for:

A sensitive sandwich-type electrochemical aptasensing platform based on  
 $\text{Ti}_3\text{C}_2\text{T}_x/\text{MoS}_2/\text{MWCNT}@r\text{GONR}$  for simultaneous detection of  
kanamycin and chloramphenicol in food sample

Xin Yao,<sup>a,b,1</sup> Liyu Yang,<sup>a,b,1</sup> Siyi Yang,<sup>a,b</sup> Jinhui Shen,<sup>a,b</sup> Danqun Huo,<sup>a,b</sup> Huanbao Fa,<sup>c</sup>

Changjun Hou,<sup>a,b,\*</sup> Mei Yang<sup>a,b,\*</sup>

<sup>a</sup> Key Laboratory of Biorheological Science and Technology, Ministry of Education, College of Bioengineering, Chongqing University, Chongqing 400044, PR China

<sup>b</sup> College of Bioengineering, Chongqing University, Chongqing 400044, PR China

<sup>c</sup> College of Chemistry and Chemical Engineering, Chongqing University, Chongqing 400044, PR China

<sup>1</sup> Xin Yao and Liyu Yang contributed equally to this work

\* Corresponding authors

E-mail addresses: houcj@cqu.edu.cn (C.J. Hou); yangmei@cqu.edu.cn (M. Yang)

Tel: +86 23 6511 2673; Fax: +86 23 6510 2507

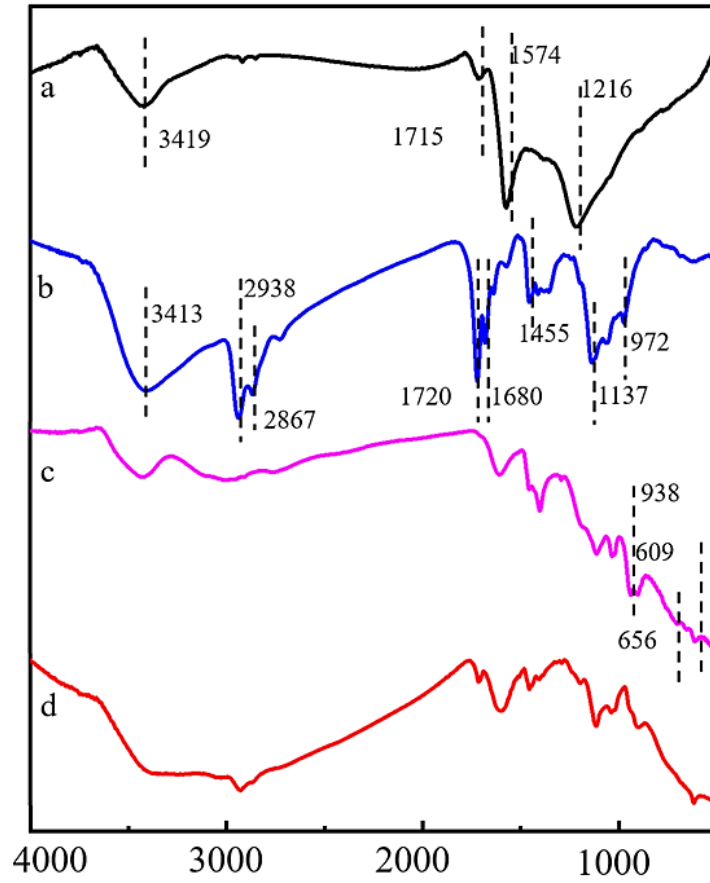

Fig. S1 FT-IR patterns of MWCNT@rGONR (a), Ti<sub>3</sub>C<sub>2</sub>T<sub>x</sub> (b), MoS<sub>2</sub> (c)

Ti<sub>3</sub>C<sub>2</sub>T<sub>x</sub>/MoS<sub>2</sub>/MWCNT@rGONR(d).

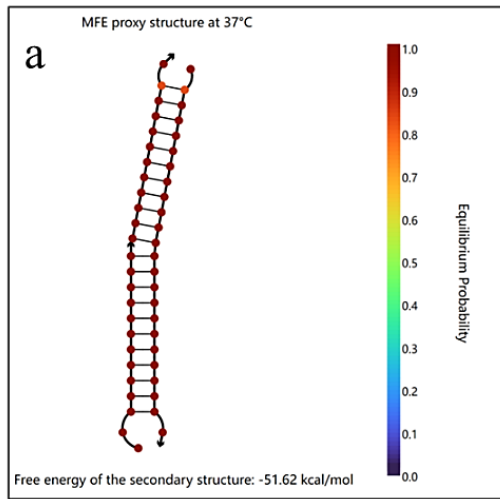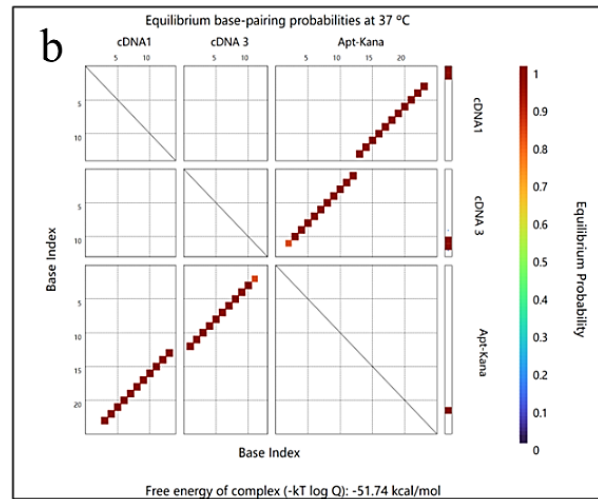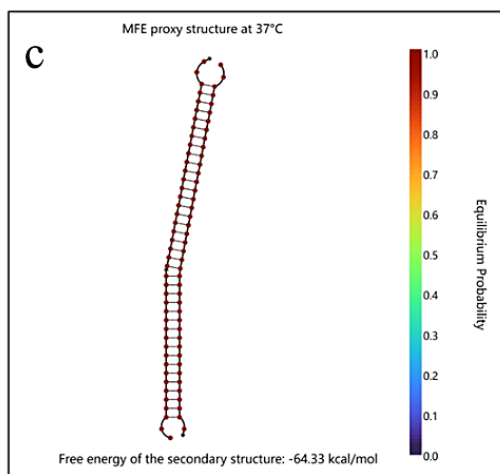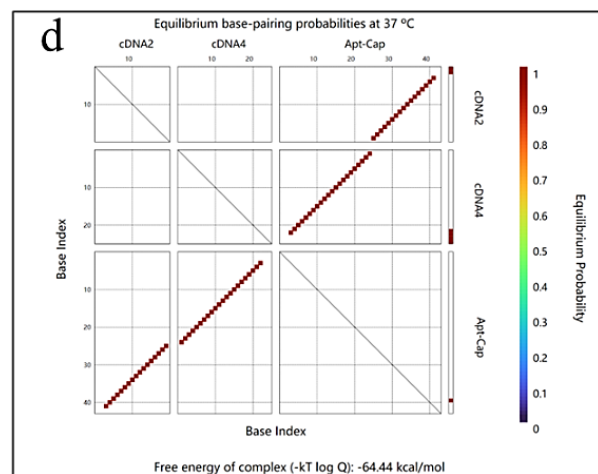

Fig. S2 Complementary pairing possibilities of the sandwich-type aptensor.
